# Supplementary material for: Fe(IV)=O/Fe(V)=O and [FeIVaqO]2+/[FeVaqO]3+ induced high-rate SMX-Cr(VI) simultaneously removal in Fe7S8-PS micro-nano catalytic system
Source: Research Square preprint supplement (doi:10.21203/rs.3.rs-3027749/v1), 2025-08-01
Supplement: Supplementary file 1 [file 01aa329e38b5d9b2817b25fe.docx]

**Supporting Information**

**for**

**Fe(IV)=O/Fe(V)=O and [O]2+/[O]3+ induced high-rate SMX-Cr(VI) simultaneously removal in Fe7S8-PS micro-nano catalytic system**

Chunyang Lia, Wenbing Wanga*, Qifeng Fana, Yunhui Zhangb, Meng Zhanga, Qianling Donga, Ghebretensae Aron Kiflea, Hui Lia*

a School of Environmental and Chemical Engineering, Shanghai University, Shanghai 200444, P.R. China

b College of Environmental Science and Engineering, Tongji University, Shanghai 200092 P.R. China

*Corresponding author:

Wenbing Wang (zaoanw@shu.edu.cn)

Hui Li (huili2018@shu.edu.cn)

Telephone: +021-66137716

**Text S1 Preparation of Fe7S8**

Fe7S8 was synthesized by an improved solvothermal method 1. First, 0.56 g FeSO4·7H2O, 0.27 g Fe(NO3)3·9H2O, and 1.21 g Na2S·9H2O were dissolved in 60 mL ethylene glycol with magnetic stirring for 20 min at room temperature to form a black solution. Then take out the rotor and transferred the black solution to a 100 mL teflon-lined stainless-steel autoclave for reaction (240°C for 12 h). After the heating process, the autoclave was cooled naturally, and centrifugal separation. After centrifugation, it was sequentially rinsed with deionized water and ethanol three times to obtain a dark black solid product, then dried at 60°C for 6 h in a vacuum oven.

**Text S2 Quantitative structure-activity relationships (QSAR)**

The Toxicity Estimation Software Tool (T.E.S.T) is an online computerized predictive system developed by an Environmental Production Agency (the download link of the T.E.S.T: https://www.epa.gov/chemical-research/toxicity-estimation-software-tool-test.), which utilizes QSAR mathematical models to estimate toxicity levels. T.E.S.T. employs a range of toxicity endpoints to predict and determine distinct toxicity values for analyzing substances based on their molecular structure's physical characteristics. The QSAR approach can serve as a substitute for costly and time-consuming conventional biometric methods for predicting the toxicity of untested compounds.

The hierarchical clustering method was adopted as the analytical and computational approach for determining the acute toxicity of LC50 and the developmental toxicity of SMX and its intermediates in the Fe7S8-PS system. In this study, the fathead minnow was chosen as the exposed model organism. The acute toxicity LC50 for fathead minnow (96 h) serves as an acute bio-toxicity indicator, reflecting the concentration of chemicals that can cause mortality in 50% of the fathead minnow population within a 96-hour exposure period. Developmental toxicity is the potential of a chemical to induce adverse developmental effects in both humans and animals.

**Text S2 Analytical methods**

The reactor was carried out in a constant temperature shaker (30°C, 150 r·min-1). At a specific reaction time point, a 1.0 mL water sample was collected and filtered with a 0.22 µm polytetrafluoroethylene membrane filter. All experiments were repeated three times to reduce experimental errors.

SMX was determined by high-performance liquid chromatography (HPLC, Waters 2695, USA) at a 270 nm wavelength with an ultraviolet detector 2. The mobile phase ratio was 60:40 (water: acetonitrile, V: V), the flow rate was 0.8 mL·min-1, and the column (SunFire-C18, 3.9×5 mm) temperature was 30°C. The SMX intermediates were analyzed using LC-MS (Agilent 1100 + thermos TSQ Quantum Ultra AM, USA). The mobile phase was a mixture of 0.1% formic acid and acetonitrile. The total gradient elution time was 11 min and the flow rate was 0.3 mL·min-1. Cr(VI) was determined by an ultraviolet-visible spectrophotometer (UV-Vis, Lambda 850, PerkinElmer, USA) at a 540 nm wavelength after the reaction with diphenyl carbamide for 5 min 3. Total Cr(VI) was determined by an inductively coupled plasma emission spectrometer (ICP, Agilent ICP-MS-7700, USA). PS was determined by UV-Vis at a 352 nm wavelength 4. Dissolved Fe2+ was analyzed by UV-Vis at a 510 nm wavelength after reacting with 1,10-Phenanthroline for 5 min 5. The surface morphology and element distribution of Fe7S8 were observed by SEM (SIGMA 500, ZEISS, Germany). The valence state change of Fe7S8 before and after the reaction was analyzed by XPS (ESCALAB 250xi, Thermo Fisher, USA) and was corrected by referencing the C 1s line to 284.5 eV. Crystallinity and secondary mineral species were analyzed by XRD (D8 Advance diffractometer, Bruker, Germany) using Cu Kα radiation (λ = 0.15418 nm) with a 2◦ min-1 scanning rate. The transformation of iron minerals was analyzed by Mössbauer spectra (MS-500, Wissel, Germany), using a 57Co/Rh source in transmission geometry, and the data were fitted by using the MossWinn 4.0 software. The types of free radicals in the Fe7S8-PS reaction system were obtained by EPRS (Bruker A300, Germany) analysis.

**Text S3 Density functional theory (DFT) calculation method**

All the DFT calculations were performed by using Gaussian 16 package 6. The geometries optimization and frequencies were computed by employing the B3LYP functional with 6-311G (d, p) basis set 7, 8, 9. The Grimme’s DFT-D3 method was applied to correct the van der Waals (vdW) interaction 10. The analyses of the electrostatic structure were performed by using Multiwfn 3.8 (dev) code 11. During the quantitative analyses of ESP on the vdW surface in the Multiwfn program, the grid spacing was set to 0.25 Bohr. The vdW surface referred to throughout this paper denotes the isosurface of *ρ* = 0.001 e/bohr3 12, 13. The isosurface maps of various orbitals and real space functions were rendered using Visual Molecular Dynamics (VMD) software 14 based on the files exported by Multiwfn. The isosurface of HOMO-LUMO orbitals and Fukui function was set to 0.05 and 0.003, respectively.

**Text S4 The characteristic peak position of Fe7S8, iron-oxide secondary minerals, and S8**

The XRD results of Fe7S8 before the reaction are shown in Figure 4a. The position and strength of the six characteristic peaks at 15.6°, 30°, 34°, 44°, 53°, and 57.8° before the reaction were consistent with those of the standard card (JCPDS#24-220), indicating that Fe7S8 was successfully prepared and had good crystallites. The characteristic peaks of limonite appeared at 57.4°, 71.5°, and 89°. The characteristic peaks of *γ-*Maghemite appeared at 23.2°, 27.9°, 34°, and 57.4°. The characteristic peaks of magnetite appeared at 30°, 53°, and 57.4° (Fig. 4b). These characteristic peaks of goethite appeared at 17°, 26.9°, 34°, 44°, and 82.1° after the reaction in the sole Fe7S8 and Fe7S8-PS systems. The characteristic peaks of S8 appeared at 23.2°, 26°, 26.9°, 27.9°, and 28.8°.

**Table S1** *k*smx of two reaction stages in the Fe7S8-PS system with diverse pH. Conditions: [Fe7S8] = 0.6 g·L-1, [PS] = 2.0 mM, [SMX] = 10.0 mg·L-1, [Cr(VI)] = 5.0 mg·L-1.

| **Reaction stage** | **pH** | ***k*SMX (min-1)** | ***R*SMX2** |
| --- | --- | --- | --- |
| First stage  (0-30 min) | 2.1 | 0.0307 | 0.962 |
| 3.2 | 0.0283 | 0.973 |
| 4.6 | 0.0188 | 0.976 |
| 5.8 | 0.0143 | 0.994 |
| 7.0 | 0.0087 | 0.950 |
| 9.0 | 0.0055 | 0.992 |
| 11.0 | 0.0010 | 0.757 |
| Second stage  (30-80 min) | 2.1 | - | - |
| 3.2 | 0.1745 | 0.927 |
| 4.6 | 0.0462 | 0.995 |
| 5.8 | 0.0354 | 0.945 |
| 7.0 | 0.0414 | 0.944 |
| 9.0 | 0.0480 | 0.930 |
| 11.0 | 0.000028 | 0.901 |

**Table S2** Comparisons of this study and previous catalyst-PS systems for the SMX-removal efficiency and reaction rate.

| **System** | ***C*SMX**  **( mg·L-1)** | **Catalyst & PS dosage ( g·L-1 & mM)** | **Initial pH** | **Reaction time (min)** | **Degradation efficiency (%)** | ***k* (min-1)** | **Reference** |
| --- | --- | --- | --- | --- | --- | --- | --- |
| Fe7S8-PS | 10.0 | 0.6 & 2.0 | 4.6 | 120 | 100% | 0.0304 | In this study |
| Fe@NCNTs-PS | 5.0 | 0.1 & 1.0 | 6.4 | 120 | 73.7 | 0.0160 | 15 |
| NRGO-PS | 10.0 | 0.5 & 0.8 | 3.4 | 250 | 91.0 | 0.0101 | 16 |
| SDBC-PS | 10.0 | 2.0 & 1.5 | 5.0 | 180 | 94.0 | 0.0145 | 17 |
| BC-PS | 0.25 | 0.09 & 0.42 | 6.0 | 90 | 82.0 | 0.0190 | 18 |
| MIP-AA-PS | 20 | 0.5 & 7.9 | - | 100 | 90.0 | 0.0025 | 19 |
| C3N5-PS | 5.0 | 0.5 & 0.41 | 5.4 | 60 | 66.6 | 0.0179 | 20 |
| Fe0-PS | 10.0 | 0.1 & 0.8 | 3.4 | 240 | - | 0.0020 | 21 |
| Fe3O4+PS | 10.0 | 0.1 & 0.8 | 3.4 | 60 | - | 0.0140 | 21 |
| FeS2+PS | 5.0 | 1.0 & 0.5 | 3.0 | 30 | 40 | 0.0270 | 22 |

**Table S3** XPS results based on curve fitting for Cr 2p, Fe 2p, S 2p and O 1s of Fe7S8 before and after the reaction in the sole Fe7S8 and Fe7S8-PS systems.

| **Elements** | **B.E.**  **(eV)** | **Species** | **Before** | | **After**  **(Sole Fe7S8 system)** | | **After**  **(Fe7S8-PS system)** | |
| --- | --- | --- | --- | --- | --- | --- | --- | --- |
| **Peak area** | **Relative fraction (%)** | **Peak**  **area** | **Relative fraction (%)** | **Peak**  **area** | **Relative fraction (%)** |
| **Cr** | 576.6 | Cr(Ⅲ)-S | - | - | 7214.3 | 26.8 | 1933.2 | 50.1 |
| 578.2 | Cr(Ⅲ)-O | - | - | 10732.7 | 39.9 | 688.3 | 17.8 |
| 587.0 | Cr(Ⅲ)-OH | - | - | 5701.5 | 21.2 | 731.3 | 19.0 |
| 589.5 | Cr(VI)-O | - | - | 3262.1 | 12.1 | 503.3 | 13.1 |
| **Fe** | 706.8 | Fe(II)-S | 36170.3 | 9.6 | 32605.9 | 9.8 | 50731.2 | 13.1 |
| 710.4 | Fe(Ⅲ)-S | 179294.6 | 47.8 | 145047.0 | 43.5 | 185495.9 | 48.0 |
| 712.7 | Fe(Ⅲ)-O | 159970.9 | 42.6 | 155718.4 | 46.7 | 150451.8 | 38.9 |
| **S** | 161.1 | Ssurface2- | 22165.4 | 21.9 | 27717.7 | 34.7 | 37803.8 | 37.0 |
| 162.2 | Sbulk2- | 13445.7 | 13.3 | 15898.7 | 20.0 | 22309.6 | 21.8 |
| 163.1 | Sn2- | 22333.5 | 22.0 | 5147.2 | 6.5 | 14703.3 | 14.3 |
| 164.2 | S8 | - | - | 12395.0 | 15.5 | 5995.3 | 5.8 |
| 166.2 | SO32- | 2899.7 | 2.9 | 1160.0 | 1.4 | 2187.4 | 2.1 |
| 168.4 | SO42- | 40499.7 | 39.9 | 17473.3 | 21.9 | 19486.6 | 19.0 |
| **O** | 529.6 | O2- | 96834.7 | 23.0 | 110008.8 | 33.6 | 110433.8 | 32.1 |
| 531.2 | OH- | 265919.3 | 62.9 | 174766.7 | 53.3 | 178091.1 | 51.8 |
| 532.9 | H2O | 59719.6 | 14.1 | 43069.7 | 13.1 | 55571.3 | 16.1 |

**Table S4** *k*SMX and *k*Cr(VI) in the Fe7S8-PS system under SO4·- and ·OH combination effect.

| **Scavenger** | **Free radical** | ***k*SMX (min-1)** | ***k*Cr(VI) (min-1)** | ***R***SMX**2** | ***R*Cr(VI)2** |
| --- | --- | --- | --- | --- | --- |
| No scavenger | SO4·-and ·OH exist | 0.0297 | 0.0227 | 0.989 | 0.982 |
| 2.0 M MeOH | No free radicals exist | 0.0002 | 0.0205 | 0.684 | 0.918 |
| 1.0 M MeOH | No free radicals exist | 0.0010 | 0.0160 | 0.971 | 0.994 |
| 2.0 M TBA | SO4·- exist | 0.0033 | 0.0175 | 0.914 | 0.955 |
| 1.0 M TBA | SO4·- exist | 0.0087 | 0.0153 | 0.985 | 0.997 |

**Table S5** Reaction rate of SMX (*k*SMX) in the Fe7S8-PS system at three stages.

| **Reaction stage** | **Conditions** | ***k*SMX (min-1)** | ***R*2** |
| --- | --- | --- | --- |
| The first stage (0-10 min) | [Fe7S8] = 0.6 g·L-1,  [PS] = 2.0 mM,  [SMX] = 10.0 mg·L-1,  [Cr(VI)] = 5.0 mg·L-1. | 0.0219 | 0.979 |
| The second stage (15-45 min) | 0.0251 | 0.997 |
| The third stage (60-80 min) | 0.0313 | 0.998 |

**Table S6** Calculated values of the Fuquois function (ƒ0 and ƒ−).

| **Atom** | **ƒ0** | **ƒ−** |
| --- | --- | --- |
| C1 | ***0.0533*** | ***0.0563*** |
| C2 | 0.0372 | 0.0279 |
| C3 | ***0.0531*** | ***0.0526*** |
| C4 | ***0.0506*** | 0.0263 |
| C5 | 0.0425 | ***0.0463*** |
| C6 | ***0.0605*** | 0.041 |
| H7 | 0.0317 | 0.029 |
| H8 | 0.0245 | 0.0207 |
| H9 | 0.0277 | 0.0191 |
| H10 | 0.0285 | 0.0269 |
| N11 | ***0.0767*** | ***0.1011*** |
| H12 | 0.035 | 0.0374 |
| H13 | 0.0359 | 0.0371 |
| S14 | 0.039 | 0.0223 |
| O15 | ***0.0523*** | ***0.0553*** |
| O16 | 0.0413 | 0.0409 |
| N17 | 0.0291 | ***0.0441*** |
| H18 | 0.014 | 0.0166 |
| C19 | 0.0179 | 0.0212 |
| C20 | 0.0405 | 0.0434 |
| H21 | 0.0139 | 0.0156 |
| C22 | 0.0221 | 0.0245 |
| N23 | ***0.0657*** | ***0.0847*** |
| O24 | 0.0394 | 0.0397 |
| C25 | 0.0151 | 0.0159 |
| H26 | 0.02 | 0.0201 |
| H27 | 0.0194 | 0.0199 |
| H28 | 0.0131 | 0.0142 |

**Table S7** Free radical consumption and electron transfer in different degradation paths of SMX at three stages.

| **Degradation pathway** | **Conditions** | **Degraded SMX (μmol)** | **Free radical consumption (μmol)** | **Electron transfer (μmol)** |
| --- | --- | --- | --- | --- |
| 1 | [Fe7S8] = 0.6 g·L-1, [PS] = 2.0 mM, [SMX] = 1.97 μmol. | 0.4  (Stage I, 0-10 min ) | 0.168 ·OH, 0.232 SO4·- | 0.632 |
| 2 | 1.34 ·OH, 1.86 SO4·- | 3.2 |
| A | 0.335 ·OH, 0.232 SO4·- | 0.8 |
| B | 1.68 ·OH, 2.32 SO4·- | 4.0 |
| C | 1.01 ·OH, 1.39 SO4·- | 2.4 |
| 1 | 1.0  (Stage II, 10-45 min) | 0.582·OH, 0.418 SO4·- | 1.42 |
| 2 | 4.66·OH, 3.34 SO4·- | 8.0 |
| A | 1.16·OH, 0.418 SO4·- | 2.0 |
| B | 5.82·OH, 4.18 SO4·- | 10.0 |
| C | 3.49·OH, 2.51 SO4·- | 6.0 |
| 1 | 0.47  (Stage III, 45-80 min ) | 0.231·OH, 0.239 SO4·- | 0.709 |
| 2 | 1.85·OH, 1.91 SO4·- | 3.76 |
| A | 0.461·OH, 0.239 SO4·- | 0.94 |
| B | 2.31·OH, 2.39 SO4·- | 4.7 |
| C | 1.38·OH, 1.44 SO4·- | 2.82 |

**Table S8** Information on intermediates and their ecotoxicity indicators. The acute toxicity was LC50 to fathead minnow within a 96-hour exposure period.

| **Compound** | **Structure** | **Formula** | **m/z** | **Acute toxicity**  **LC50 (mg·L-1)** | **Developmental**  **toxicity** |
| --- | --- | --- | --- | --- | --- |
| SMX | 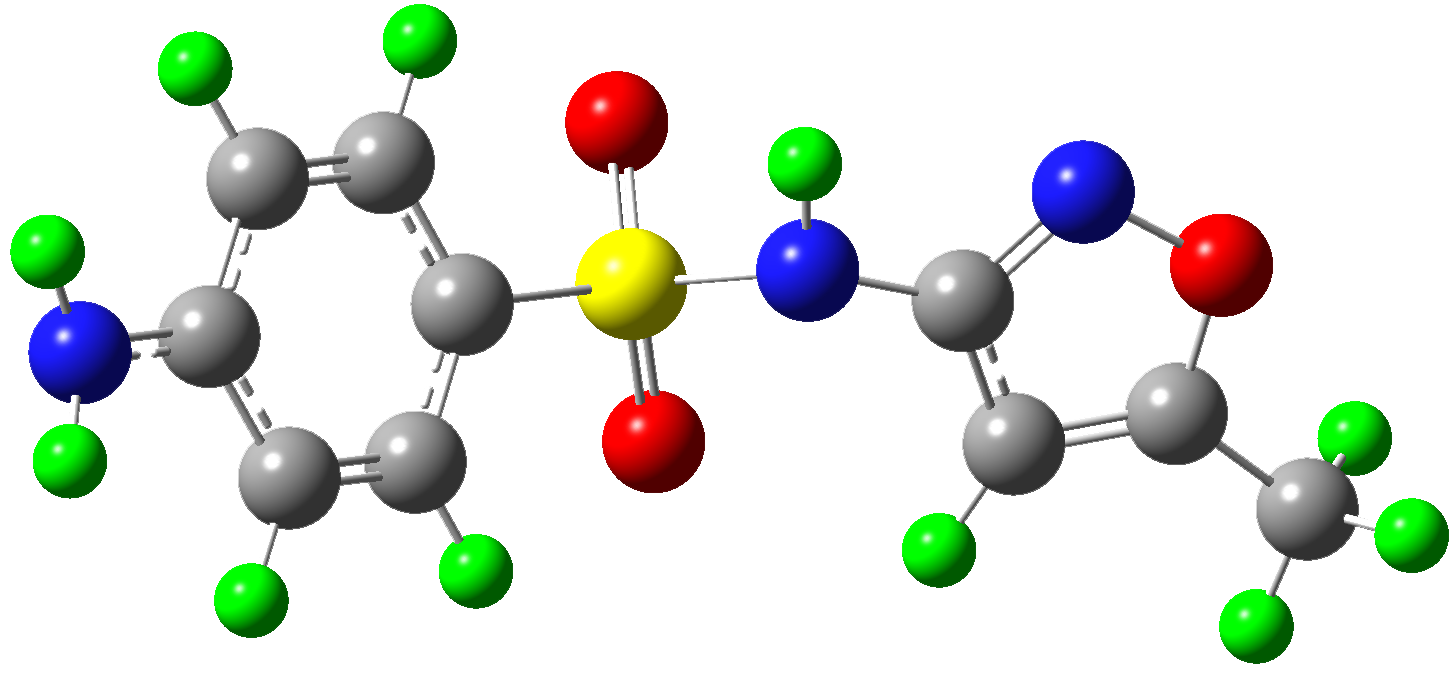 | C10H11N3O3S | 253 | ~2.81 | 0.85 |
| 3-amino-5-methylisooxazole | 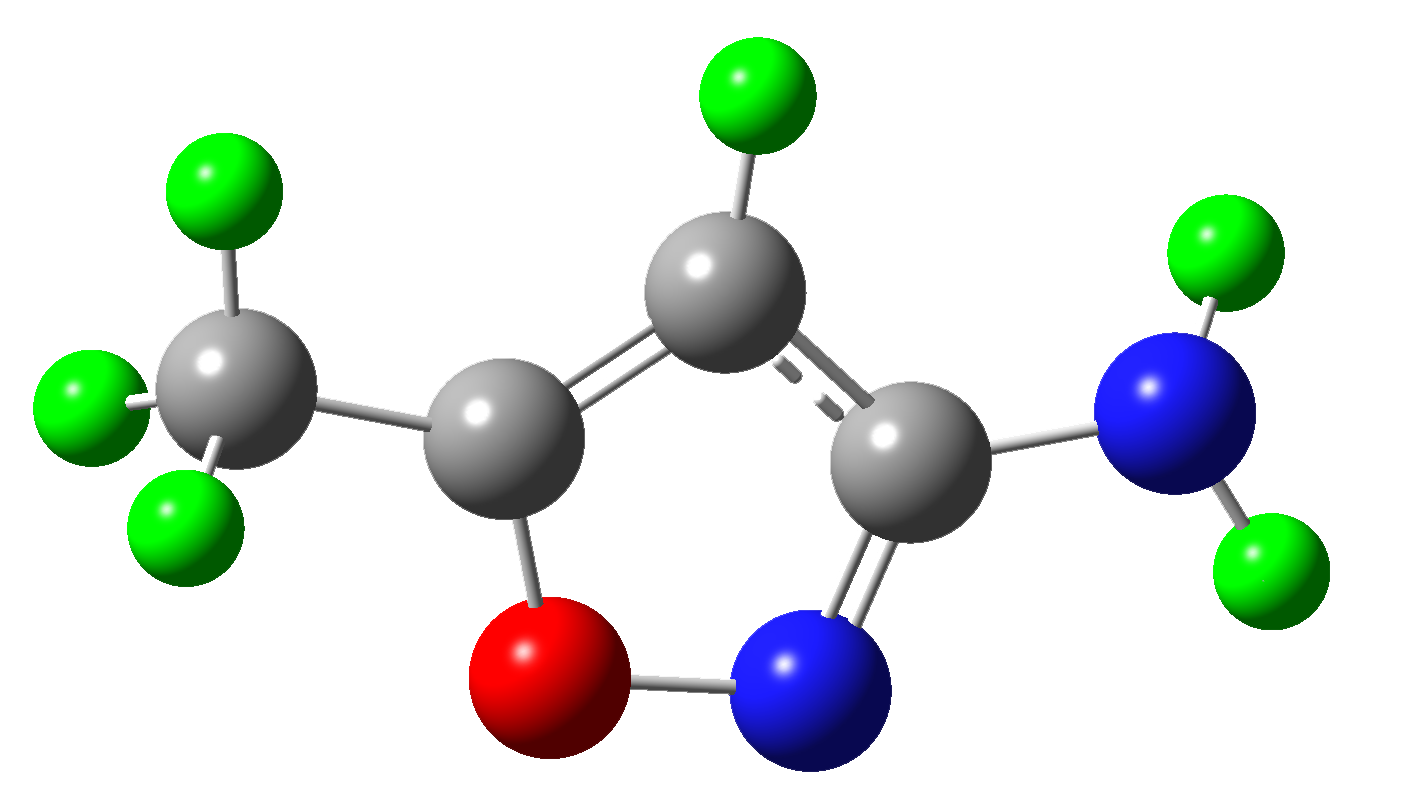 | C4H6N2O | 99 | 423.50 | 0.33 |
| Sulfanilic acid | 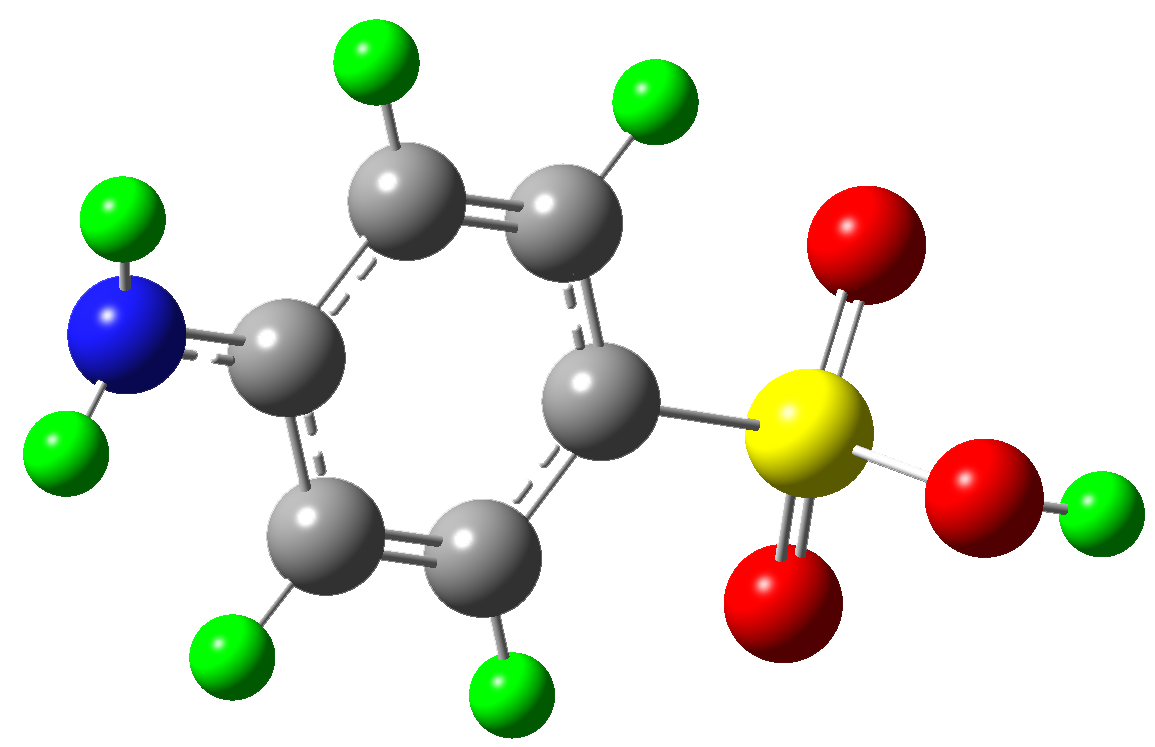 | C6H7NO3S | 173 | 152.79 | 0.45 |
| 4-aminophenol | 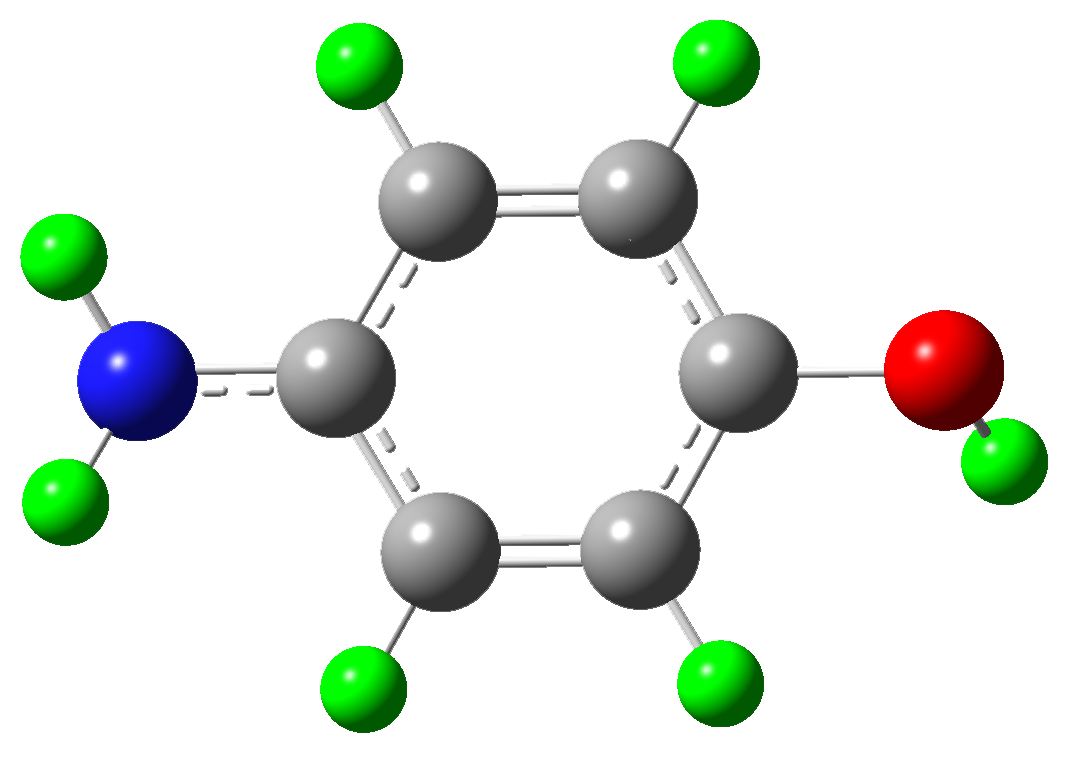 | C6H7NO | 110 | 72.93 | 0.57 |
| 5-methylisoxazole | 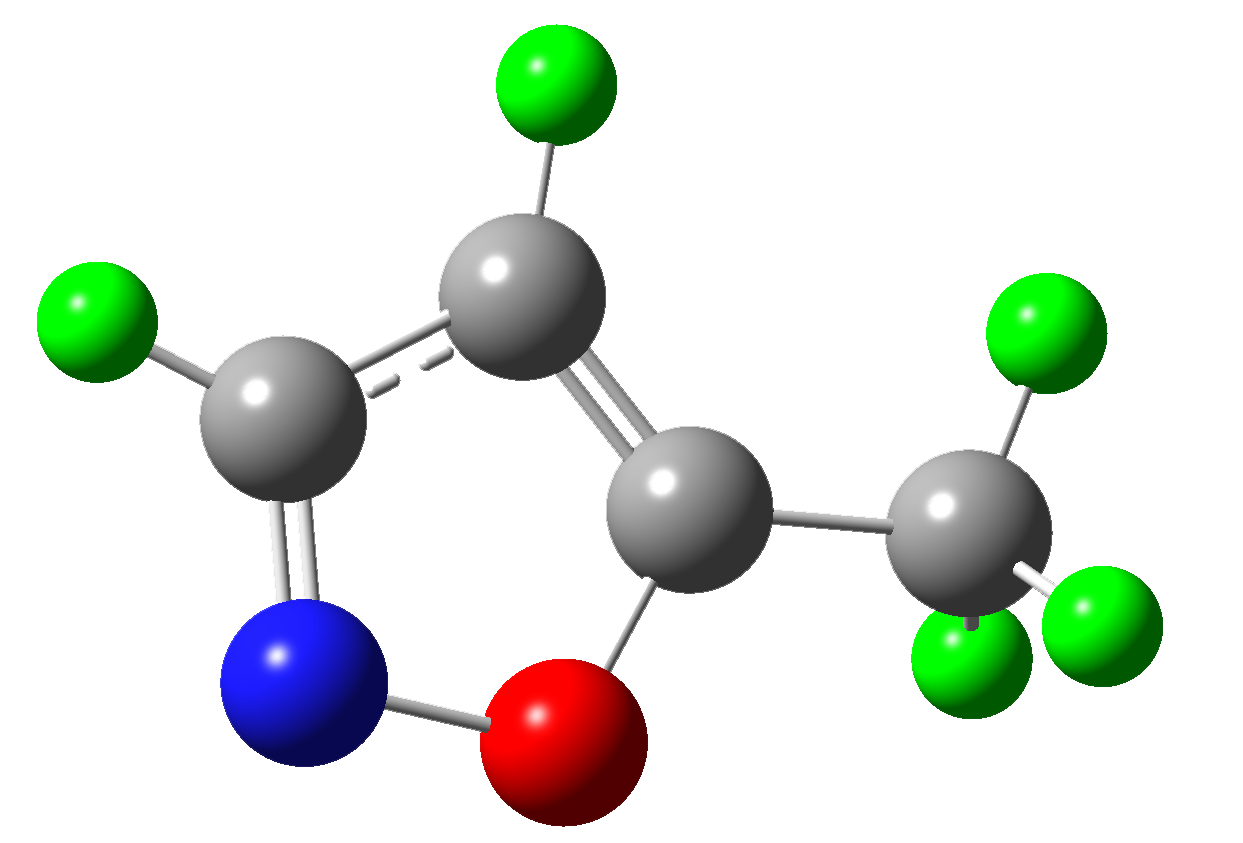 | C4H5NO | 83 | 339.36 | 0.29 |
| 2,4-dinitrobenzene sulfinic acid | 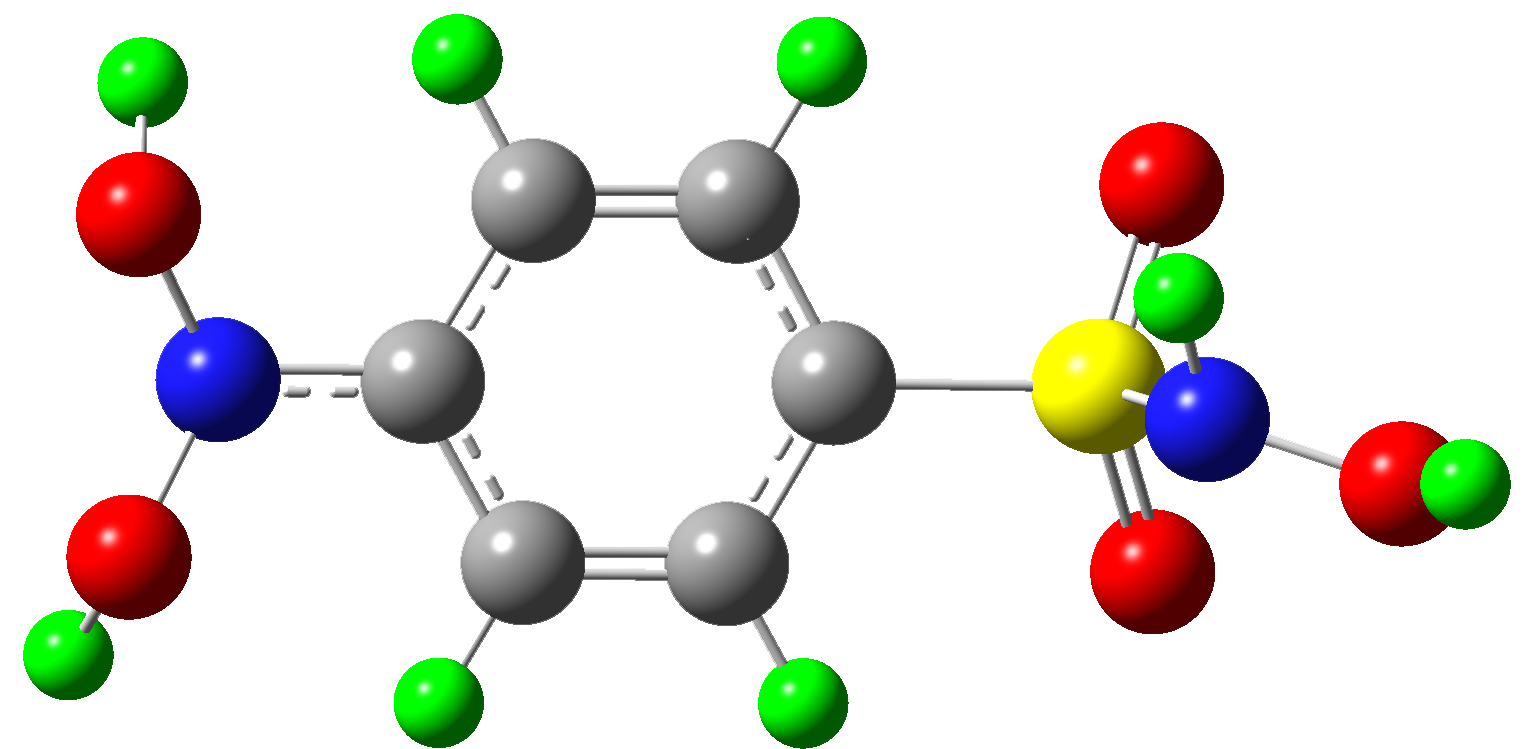 | C6H4N2O5S | 218 | N/A | 0.54 |
| P1 | 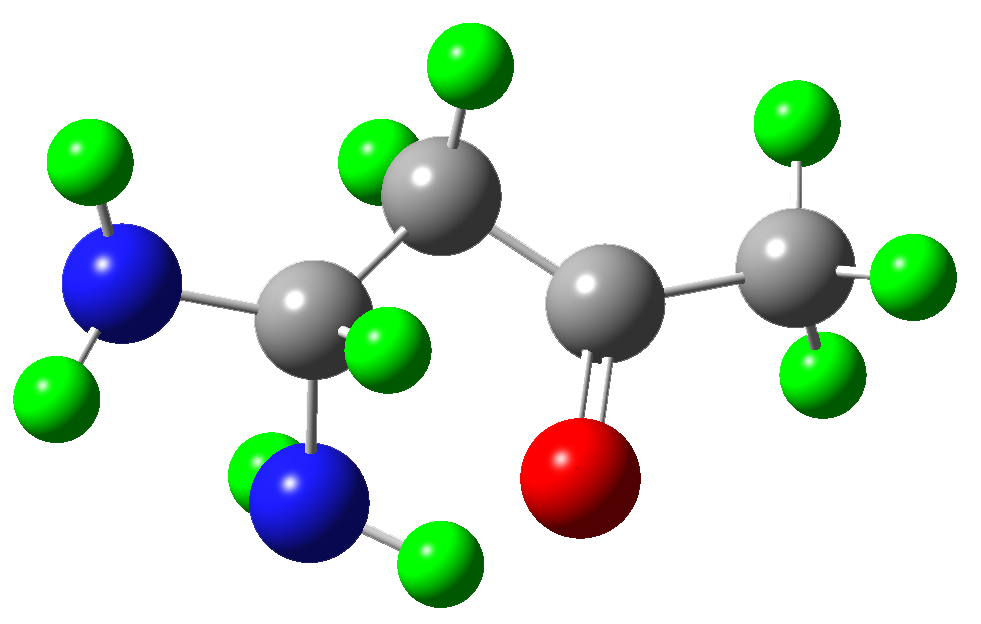 | C4H10N2O | 102 | 478.68 | 0.65 |
| P2 | 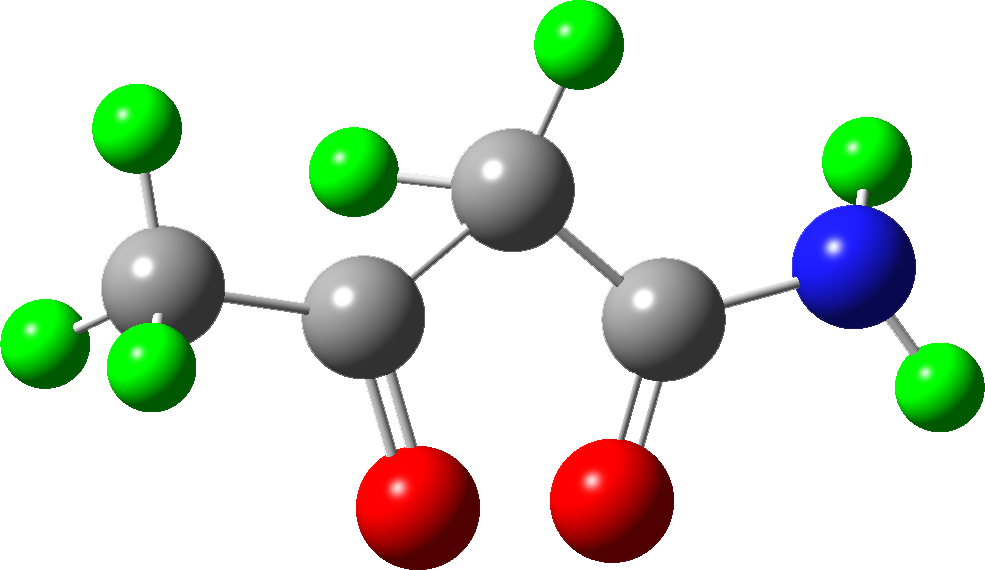 | C4H7NO2 | 102 | 834.33 | 0.56 |
| P3 | 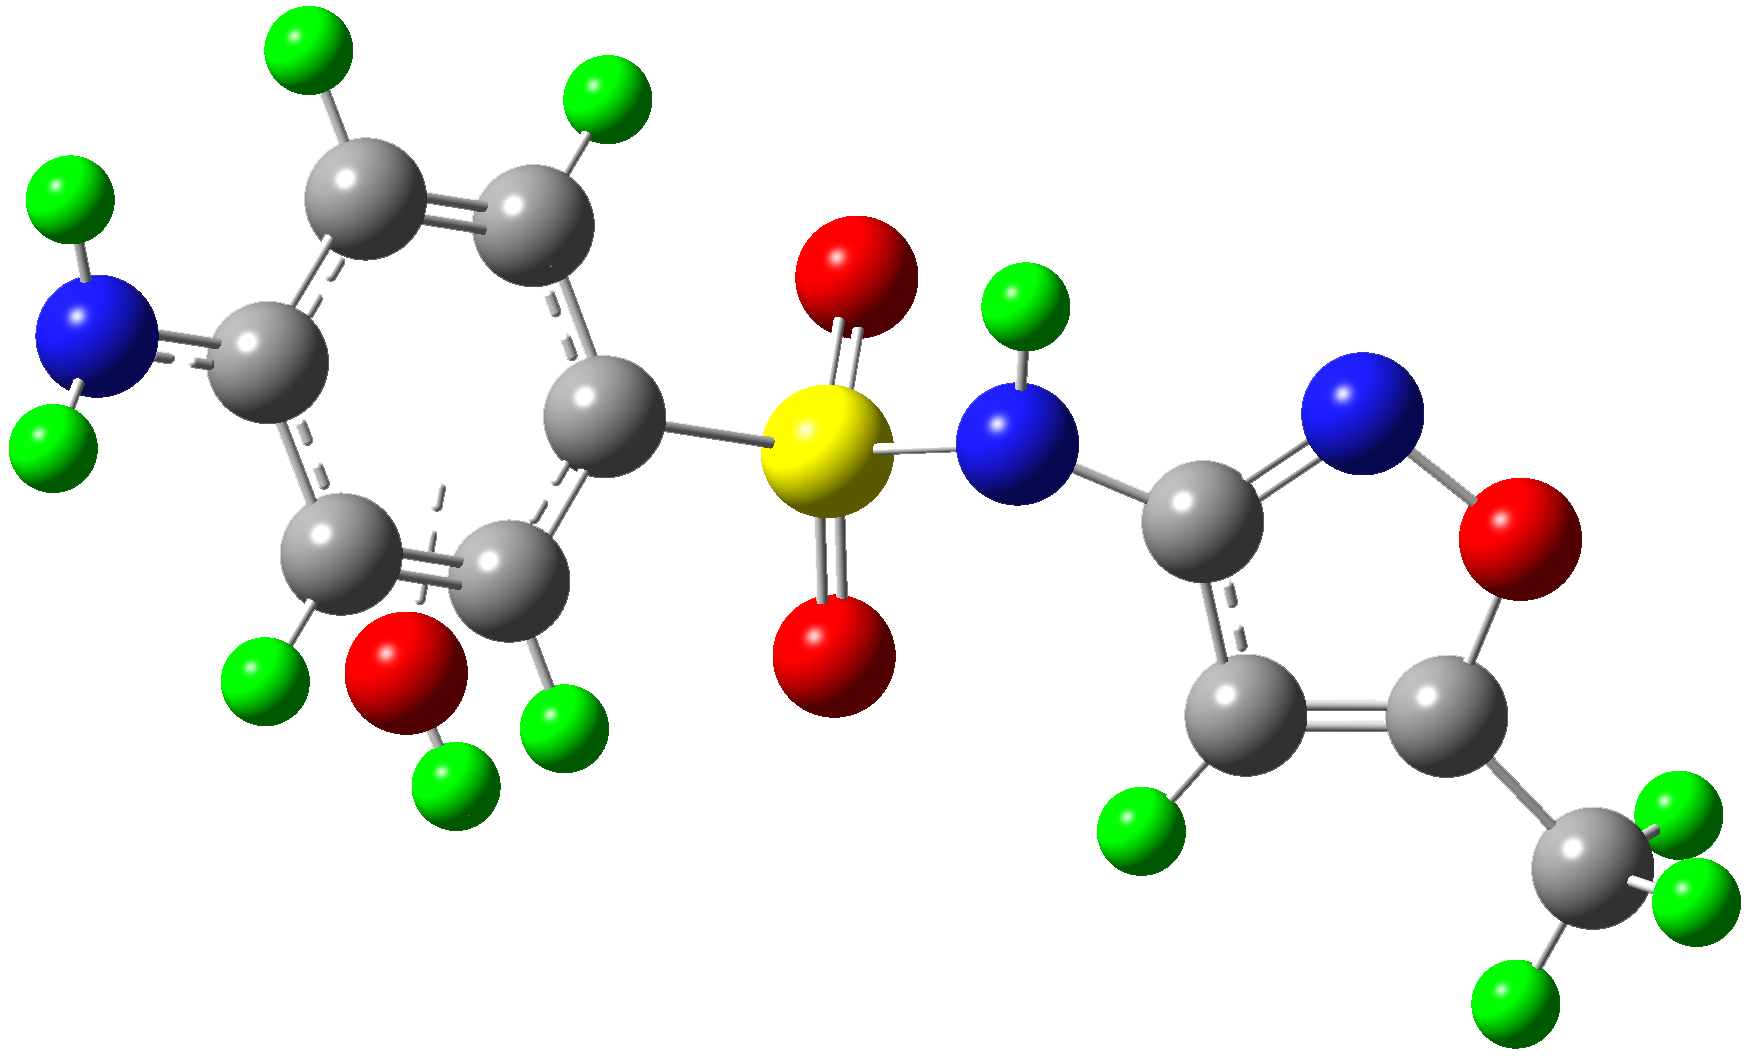 | C10H11N3O4S | 270 | N/A | 0.93 |
| P4 | 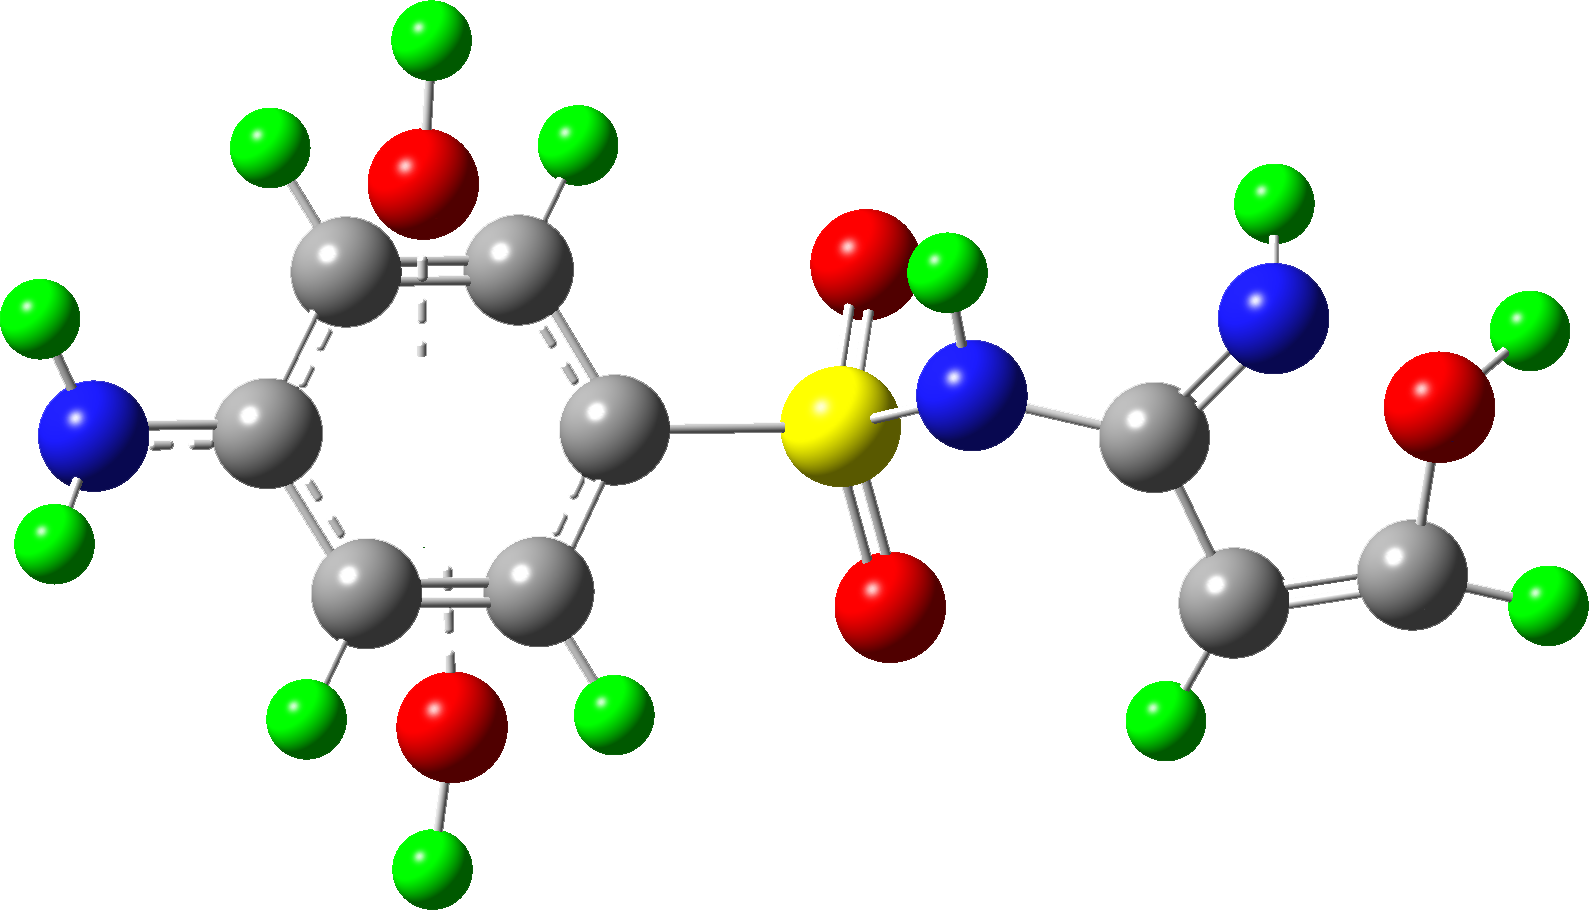 | C9H11N3O5S | 274 | N/A | 0.91 |
| P5 | 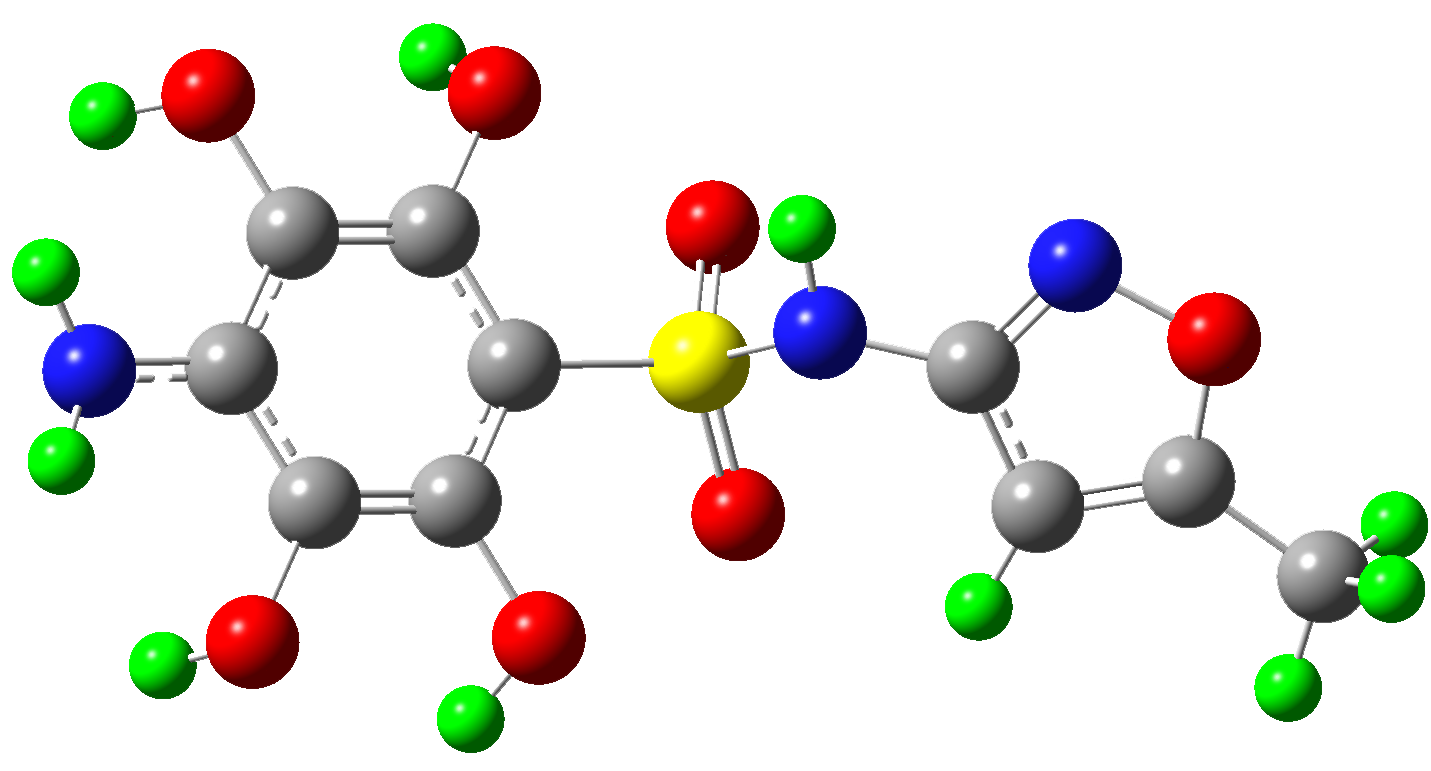 | C10H11N3O7S | 318 | N/A | 0.75 |
| P6 | 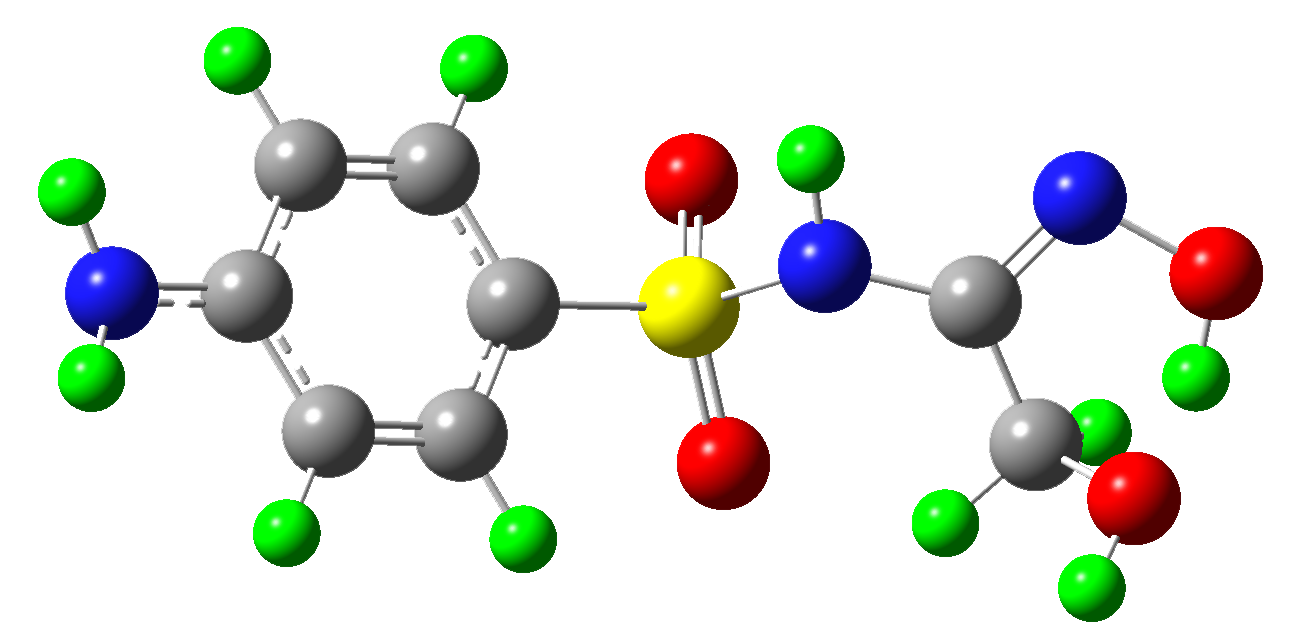 | C8H11N3O4S | 246 | N/A | 0.87 |
| P7 | 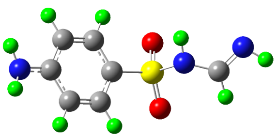 | C7H9N3O2S | 200 | N/A | 0.85 |
| P8 | 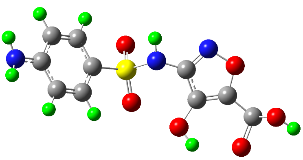 | C10H11N3O6S | 302 | N/A | 0.85 |
| P9 | 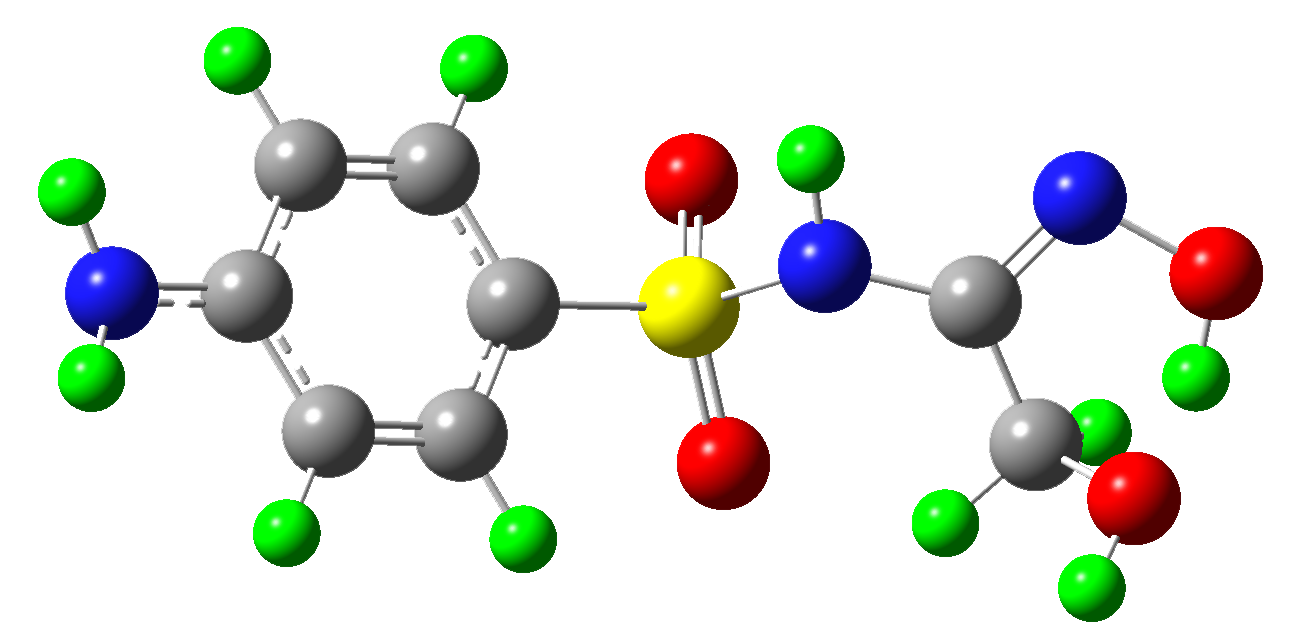 | C10H11N3O7S | 318 | N/A | 0.87 |
| P10 | 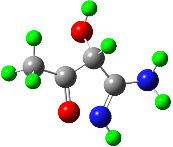 | C4H8N2O2 | 115 | N/A | 0.72 |
| P11 | 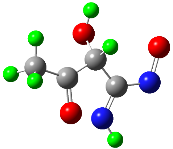 | C4H6N2O3 | 130 | N/A | 0.55 |
| P12 | 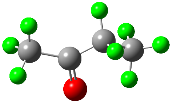 | C4H8O | 73 | 746.11 | 0.48 |


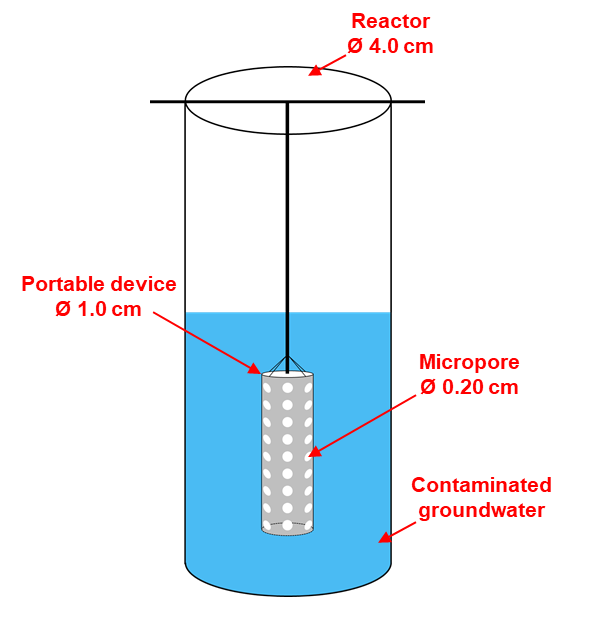


**Fig. S1** The design drawing of the reactor (Ø 4.0 cm, length 9.0 cm) and the portable device (Ø 1.0 cm, length 3.0 cm) for Fe7S8 powder loading.


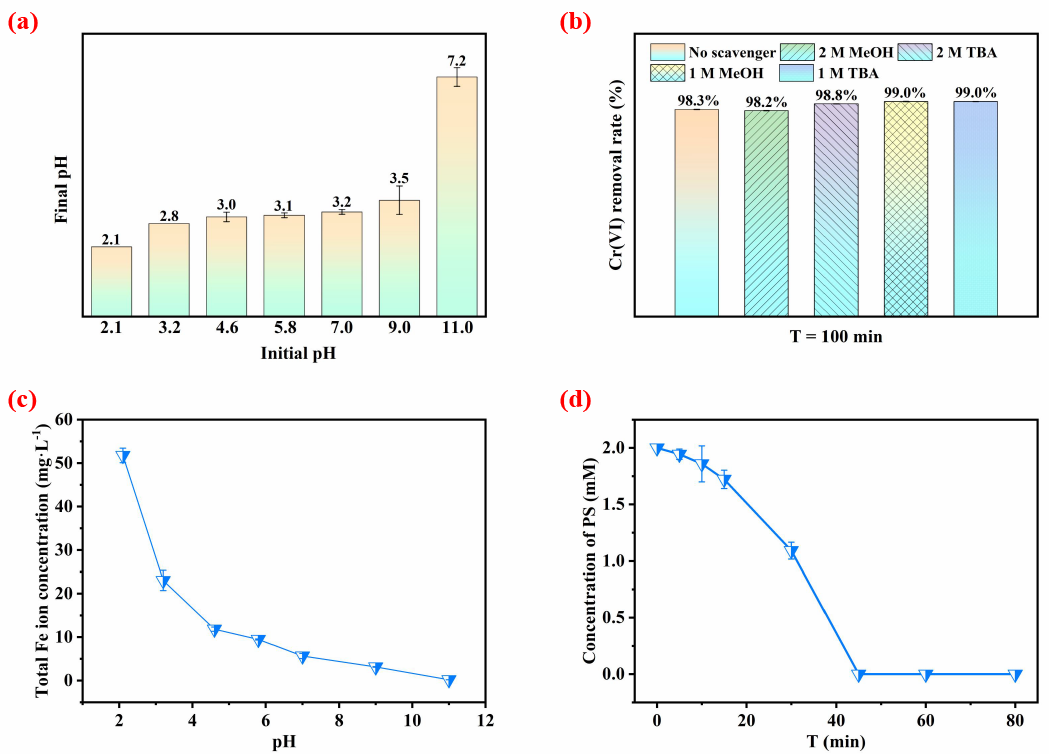


**Fig. S****2** The pH change after the reaction in the Fe7S8-PS system (a); the Cr(VI)-removal under different scavenger concentrations at 100 min (b); the amount of iron ion leaching of Fe7S8 in ultrapure water under different initial pH at 80 min (c); the change of PS concentration during the reaction in the Fe7S8-PS (Cr(III)) system (d). Conditions: [Fe7S8] = 0.6 g·L-1, [PS] = 2.0 mM, [Cr(Ⅲ)] = 40.0 mg·L-1, [SMX] = 10.0 mg·L-1, [Cr(VI)] = 5.0 mg·L-1, initial pH = 4.6.


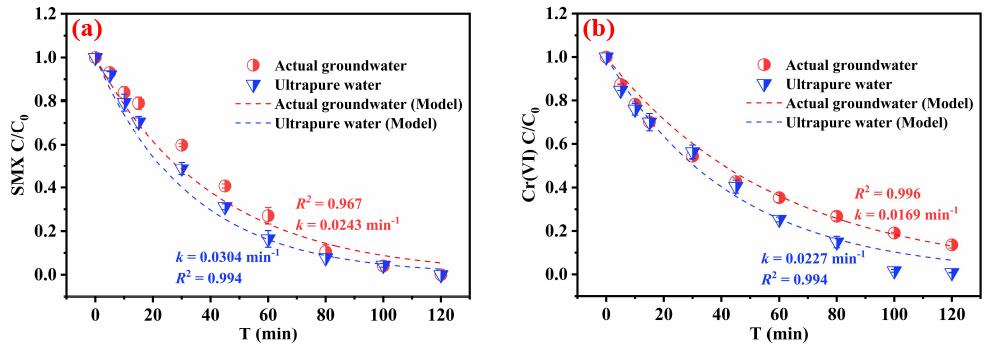


**Fig. S3** The SMX-Cr(VI) removal kinetics in actual groundwater and ultrapure water. Conditions: [Fe7S8] = 0.6 g·L-1, [PS] = 2.0 mM, [SMX] = 10.0 mg·L-1, [Cr(VI)] = 5.0 mg·L-1, initial pH = 4.6. The original pH value of actual groundwater is 8.1, and the redox potential of actual groundwater is 263.0 mV.


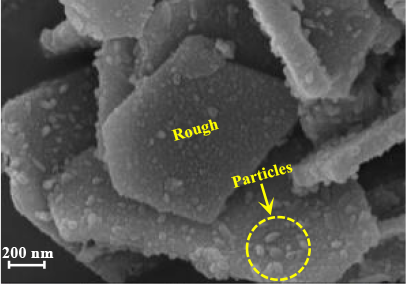


**Fig. S4** SEM image of Fe7S8 from the sole Fe7S8 system after the reaction.


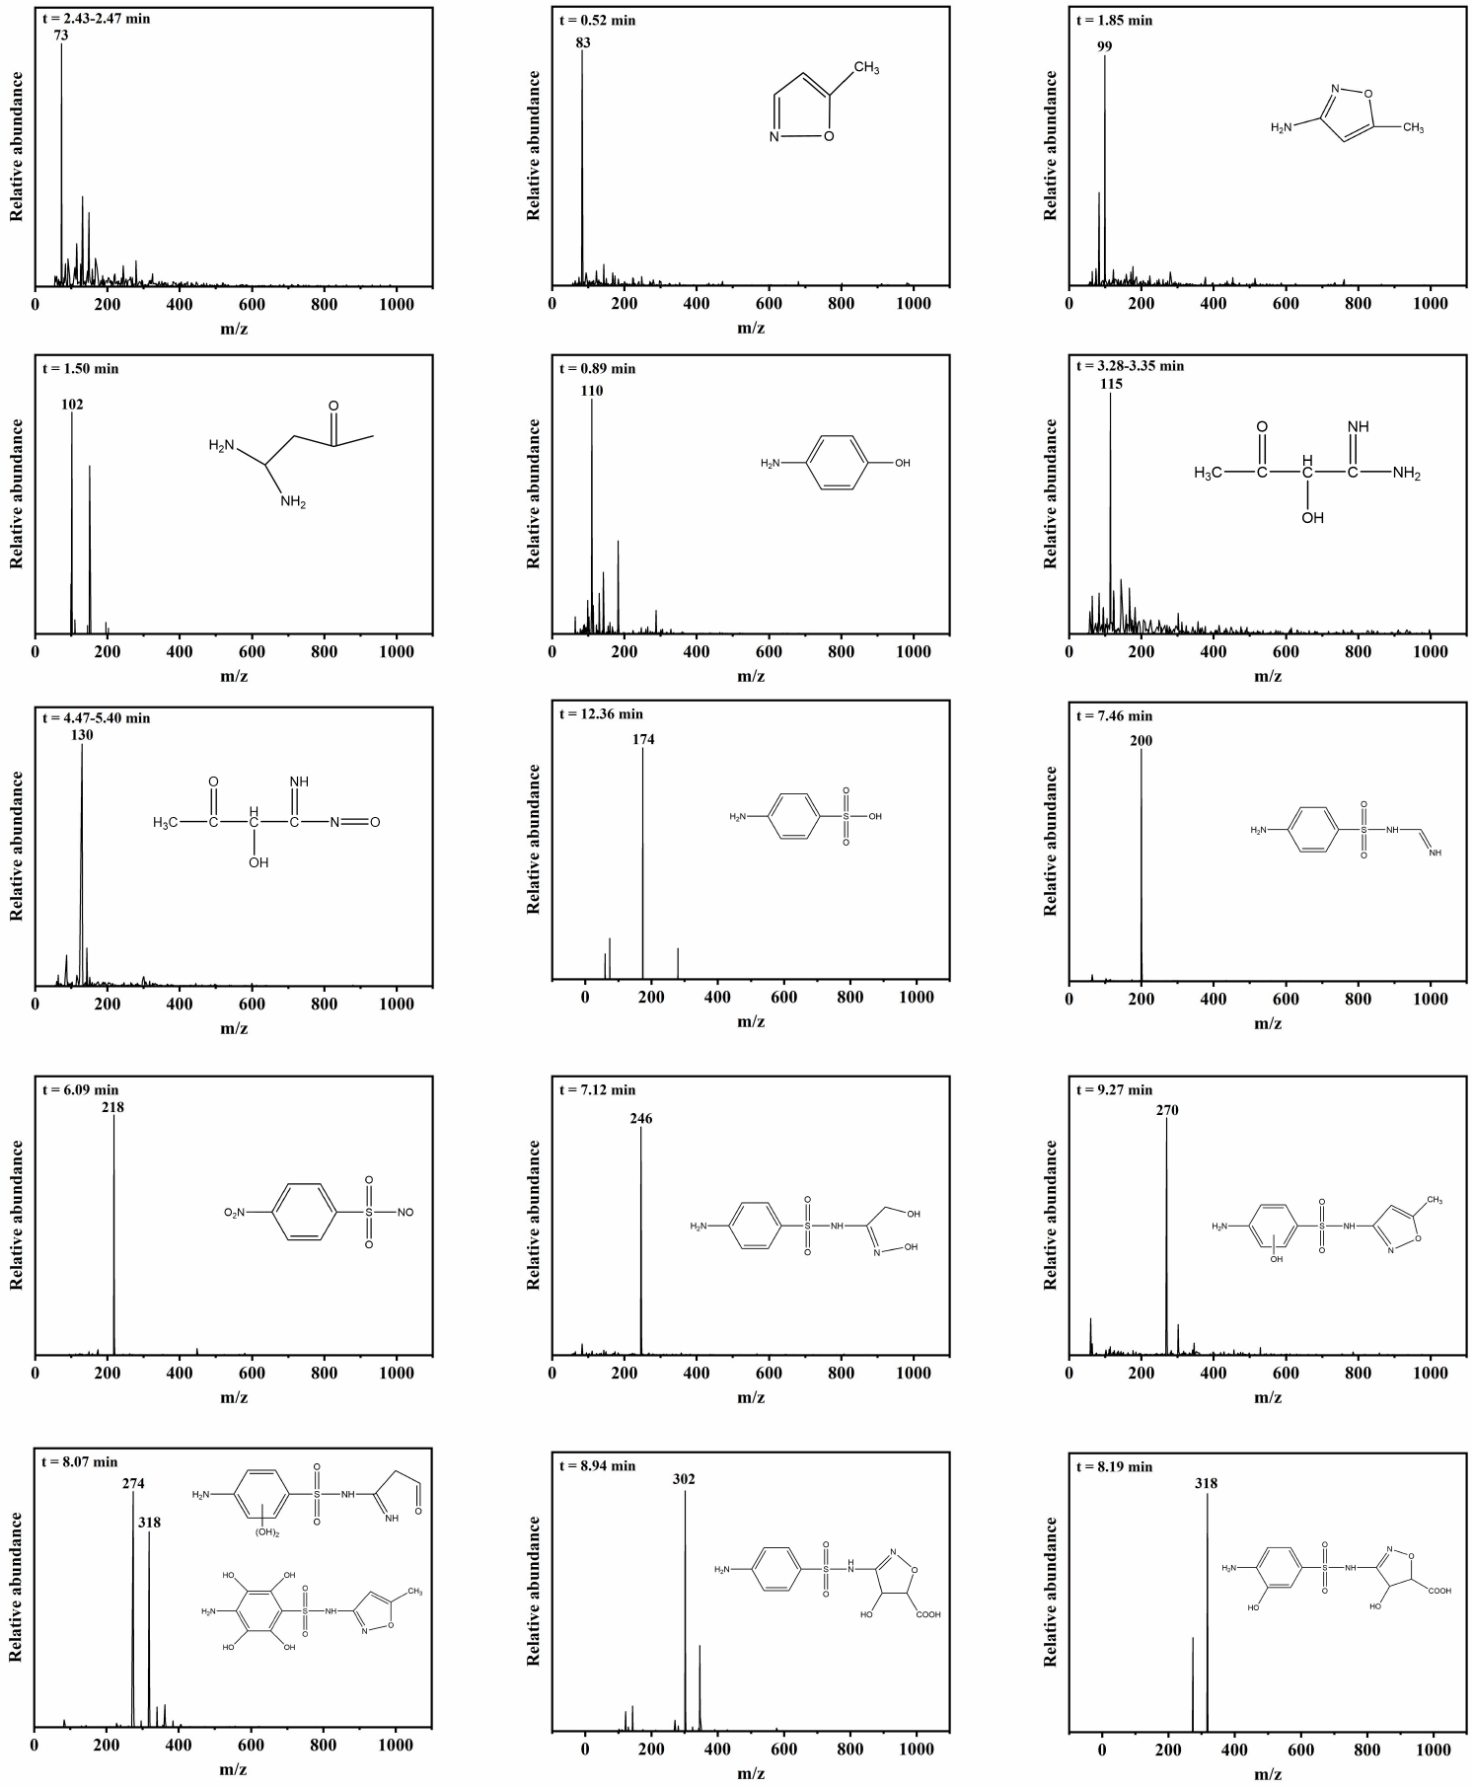


**Fig. S5** Mass spectra of SMX intermediates in the Fe7S8-PS system. Conditions: [Fe7S8] = 0.6 g·L-1, [PS] = 2.0 mM, [SMX] = 10.0 mg·L-1, [Cr(VI)] = 5.0 mg·L-1,, initial pH = 4.6.


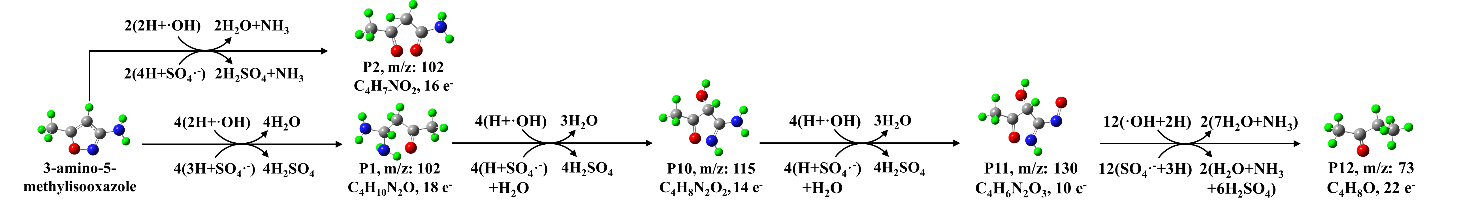


**Fig. S6** Proposed transformation pathways of 3-amino-5-methylisooxazole in the Fe7S8-PS system. H stands for one electron equivalent.

**References**

1. Li C*, et al.* Iron-sulphur transformation control for enhancing Cr(VI) removal in flake and nanoscale porous pyrrhotite (Fe7S8) added wastewater. *Journal of Hazardous Materials* **436**, 129079 (2022).

2. Kohantorabi M, Moussavi G, Oulego P, Giannakis S. Radical-based degradation of sulfamethoxazole via UVA/PMS-assisted photocatalysis, driven by magnetically separable Fe3O4@CeO2@BiOI nanospheres. *Separation and Purification Technology* **267**, 118665 (2021).

3. Shen W, Mu Y, Xiao T, Ai Z. Magnetic Fe3O4-FeB nanocomposites with promoted Cr(VI) removal performance. *Chemical Engineering Journal* **285**, 57-68 (2016).

4. Liu Y*, et al.* Current analytical methods for the determination of persulfate in aqueous solutions: A historical review. *Chemical Engineering Journal* **416**, 129143 (2021).

5. Liu W, Wang Y, Ai Z, Zhang L. Hydrothermal synthesis of FeS2 as a high-efficiency Fenton reagent to degrade alachlor via superoxide-mediated Fe(II)/Fe(III) cycle. *ACS Applied Materials & Interfaces* **7**, 28534-28544 (2015).

6. Frisch MJ*, et al.* Gaussian 16, Revision A.03.). Gaussian, Inc. (2016).

7. Becke AD. A new mixing of Hartree-Fock and local density-functional theories. *Journal of Chemical Physics* **98**, 1372-1377 (1993).

8. Stephens PJ, Devlin FJ, Chabalowski CF, Frisch MJ. Ab Initio calculation of vibrational absorption and circular dichroism spectra using density functional force fields. *Journal of Chemical Physics* **98**, 11623-11627 (1994).

9. Hehre WJ, Ditchfield R, Pople JA. Self-consistent molecular orbital methods. XII. Further extensions of Gaussian-type basis sets for use in molecular orbital studies of organic molecules. *Journal of Chemical Physics* **56**, 2257-2261 (1972).

10. Grimme S, Antony J, Ehrlich S, Krieg H. A consistent and accurate ab initio parametrization of density functional dispersion correction (DFT-D) for the 94 elements H-Pu. *Journal of Chemical Physics*, 154104 (2010).

11. Lu T, Chen FW. Multiwfn: a multifunctional wave function analyzer. *Journal of Computational Chemistry* **33**, 580-592 (2012).

12. Manzettia S, Lu T. The geometry and electronic structure of Aristolochic acid: possible implications for a frozen resonance. *Journal of Physical Organic Chemistry* **26**, 473-483 (2013).

13. Lu T, Manzettia S. Wavefunction and reactivity study of benzo[a]pyrene diol epoxide and its enantiomeric forms. *Structural Chemistry* **25**, 1521-1533 (2014).

14. Humphrey W, Andrew D, Schulten K. VMD: visual molecular dynamics. *Journal of Molecular Graphics & Modelling* **14**, 33-38 (1996).

15. Zheng J*, et al.* Peroxymonosulfate activation by Mg-introduced Fe-N carbon nanotubes to accelerate sulfamethoxazole degradation: Singlet oxygen-dominated nonradical pathway. *Chemical Engineering Journal* **452**, 139233 (2023).

16. Wang S, Xu L, Wang J. Nitrogen-doped graphene as peroxymonosulfate activator and electron transfer mediator for the enhanced degradation of sulfamethoxazole. *Chemical Engineering Journal* **375**, 122041 (2019).

17. Yin R*, et al.* Singlet oxygen-dominated peroxydisulfate activation by sludge-derived biochar for sulfamethoxazole degradation through a nonradical oxidation pathway: Performance and mechanism. *Chemical Engineering Journal* **357**, 589-599 (2019).

18. Kemmou L, Frontistis Z, Vakros J, Manariotis ID, Mantzavinos D. Degradation of antibiotic sulfamethoxazole by biochar-activated persulfate: Factors affecting the activation and degradation processes. *Catalysis Today* **313**, 128-133 (2018).

19. Xie Y*, et al.* Targeted degradation of sulfamethoxazole in wastewater by molecularly imprinted MOFs in advanced oxidation processes: Degradation pathways and mechanism. *Chemical Engineering Journal* **429**, 132237 (2022).

20. Zhang J*, et al.* Experimental and DFT insights into the visible-light driving metal-free C3N5 activated persulfate system for efficient water purification. *Applied Catalysis B: Environmental* **289**, 120023 (2021).

21. Wang S, Wang J. Synergistic effect of PMS activation by Fe0@Fe3O4 anchored on N, S, O co-doped carbon composite for degradation of sulfamethoxazole. *Chemical Engineering Journal* **427**, 131960 (2022).

22. Li Y*, et al.* Acceleration of traces of Fe3+-activated peroxymonosulfate by natural pyrite: A novel cocatalyst for improving Fenton-like processes. *Chemical Engineering Journal* **435**, 134893 (2022).
